# Supplementary material for: Pathological Features and Genomic Characterization of an Actinobacillus equuli subsp. equuli Bearing Unique Virulence-Associated Genes from an Adult Horse with Pleuropneumonia
Source: MDPI journal article supplement (doi:10.3390/pathogens12020224), 2023-01-31
Supplement: s1 [file s1]

Table S1. *Actinobacillus* species used in this study and their characteristics.

|    | Invasive/<br>non-invasive<br>species | Species                               | Strain     | GenBank Accession    | Host    | Source                  |
|----|--------------------------------------|---------------------------------------|------------|----------------------|---------|-------------------------|
| 1  | Invasive<br>species                  | <i>A. capsulatus</i>                  | DSM 19761  | ARFN00000000.1       | Rabbit  | Joint                   |
| 2  |                                      | <i>A. equuli</i> subsp. <i>equuli</i> | ATCC 19392 | NZ_CP007715.1        | Horse   | Unknown                 |
| 3  |                                      | <i>A. lignieresii</i>                 | NCTC4189   | NZ_UFRM01000001      | Cattle  | Glands                  |
| 4  |                                      | <i>A. pleuropneumoniae</i>            | NCTC10976  | NZ_LR134515.1        | Pig     | Unknown                 |
| 5  |                                      | <i>A. seminis</i>                     | NCTC10851  | NZ_UFSB01000001      | Sheep   | Semen                   |
| 6  |                                      | <i>A. suis</i>                        | ATCC33415  | NZ_CP009159.1        | Pig     | Septicemia              |
| 7  |                                      | <i>A. ureae</i>                       | NCTC10220  | NZ_UFSD01000002.1    | Human   | Unknown                 |
| 8  | Non-invasive<br>species              | <i>A. delphinicola</i>                | NCTC12871  | NZ_LR134510.1        | Porcine | Lung                    |
| 9  |                                      | <i>A. indolicus</i>                   | 46K2C      | NZ_CABFKH010000001.1 | Pig     | Upper respiratory tract |
| 10 |                                      | <i>A. minor</i>                       | NM305      | ACQL00000000.1       | Unknown | Unknown                 |
| 11 |                                      | <i>A. porcinus</i>                    | NM319      | NZ_CABFKI010000029   | Pig     | Upper respiratory tract |
| 12 |                                      | <i>A. porcitonisillarum</i>           | 9953L55    | NZ_CP029206.1        | Pig     | Unknown                 |
| 13 |                                      | <i>A. succinogenes</i>                | GXAS137    | NZ_NHRD000000000     | Bovine  | Rumen                   |

Table S2. Shared and strain specific virulence-associated genes detected in *A. equuli* subsp. *equuli* 4524 and ATCC 19392 strains

| <i>A. equuli</i> subsp. <i>equuli</i> strain 4524<br>(JAPHVQ000000000) |                                                    |        |        | Homologue gene detected in <i>A. equuli</i> subsp. <i>equuli</i> ATCC 19392<br>(NZ_CP007715) | Shared genes/ Strain specific genes | Nucleotide Identity (%) | Amino acid Identity (%) | Comments |
|------------------------------------------------------------------------|----------------------------------------------------|--------|--------|----------------------------------------------------------------------------------------------|-------------------------------------|-------------------------|-------------------------|----------|
| Virulence Factor                                                       | Gene                                               | Start  | End    |                                                                                              |                                     |                         |                         |          |
| Iron acquisition                                                       | NA                                                 | NA     | NA     | <i>TonB-dependent siderophore receptor</i>                                                   |                                     | NA                      | NA                      |          |
|                                                                        | <i>TonB-dependent receptor plug domain protein</i> | 15177  | 18164  | NA                                                                                           | Strain specific genes               | NA                      | NA                      |          |
|                                                                        | <i>FhuD</i>                                        | 127505 | 128386 | NA                                                                                           |                                     | NA                      | NA                      |          |
|                                                                        | <i>FhuB</i>                                        | 128386 | 130335 | NA                                                                                           |                                     | NA                      | NA                      |          |
|                                                                        | <i>mrp</i>                                         | 4188   | 5285   | <i>apbC</i>                                                                                  |                                     | 98.27                   | 100                     |          |
|                                                                        | <i>fepD</i>                                        | 17374  | 18324  | <i>fepD</i>                                                                                  |                                     | 97.48                   | 99.37                   |          |
|                                                                        | <i>hutW</i>                                        | 17463  | 19280  | <i>hutW</i>                                                                                  |                                     | 97.14                   | 98.84                   |          |
|                                                                        | <i>Hemin receptor</i>                              | 19211  | 21451  | TonB-dependent receptor                                                                      |                                     | 98.53                   | 99.46                   |          |
|                                                                        | <i>fbpB</i>                                        | 24003  | 26066  | <i>fbpB</i>                                                                                  |                                     | 98.64                   | 99.56                   |          |
|                                                                        | <i>cirA</i>                                        | 45439  | 47415  | <i>cirA</i>                                                                                  |                                     | 98.99                   | 99.09                   |          |
|                                                                        | <i>fhuC</i>                                        | 45811  | 46575  | <i>ATP-binding cassette domain-containing protein</i>                                        |                                     | 99.48                   | 100                     |          |
|                                                                        | <i>fepB</i>                                        | 46575  | 47528  | <i>fepB</i>                                                                                  |                                     | 98.64                   | 99.06                   |          |
|                                                                        | <i>fepD</i>                                        | 47522  | 49468  | <i>FhuB</i>                                                                                  |                                     | 95.94                   | 97.84                   |          |
|                                                                        | <i>petE</i>                                        | 49064  | 49495  | <i>petE</i>                                                                                  |                                     | 99.07                   | 99.31                   |          |
|                                                                        | <i>znuA</i>                                        | 49397  | 50293  | <i>znuA</i>                                                                                  |                                     | 97.96                   | 99.28                   |          |
|                                                                        | <i>Outer membrane ferric hydroxamate receptor</i>  | 49522  | 51609  | <i>TonB-dependent siderophore receptor</i>                                                   | Shared genes                        | 98.18                   | 99.28                   |          |
|                                                                        | <i>fepD</i>                                        | 50288  | 51325  | <i>fepD</i>                                                                                  |                                     | 97.11                   | 98.55                   |          |
|                                                                        | <i>znuC</i>                                        | 50295  | 51050  | <i>znuC</i>                                                                                  |                                     | 95.4                    | 98.8                    |          |
|                                                                        | <i>erpA</i>                                        | 70275  | 70616  | <i>erpA</i>                                                                                  |                                     | 95.03                   | 99.12                   |          |
|                                                                        | <i>iscC</i>                                        | 74520  | 75746  | <i>iscS</i>                                                                                  |                                     | 95.93                   | 99.51                   |          |
|                                                                        | <i>iscU</i>                                        | 75879  | 76262  | <i>iscU</i>                                                                                  |                                     | 98.44                   | 100                     |          |
|                                                                        | <i>iscA</i>                                        | 76403  | 76726  | <i>iscA</i>                                                                                  |                                     | 96.3                    | 100                     |          |
|                                                                        | <i>fdx</i>                                         | 80441  | 80782  | <i>fdx</i>                                                                                   |                                     | 98.54                   | 100                     |          |
|                                                                        | <i>iscX</i>                                        | 80782  | 80976  | <i>iscX</i>                                                                                  |                                     | 99.49                   | 100                     |          |
|                                                                        | <i>TonB-dependent receptor</i>                     | 81061  | 83778  | <i>Lactoferrin/transferrin family TonB-dependent receptor</i>                                |                                     | 99.68                   | 99.78                   |          |

|  |                                                                                |        |        |                                                   |                       |       |       |
|--|--------------------------------------------------------------------------------|--------|--------|---------------------------------------------------|-----------------------|-------|-------|
|  | <i>Iron-regulated protein FrpC</i>                                             | 100034 | 101014 | <i>Hypothetical protein</i>                       |                       | 93.03 | 95.77 |
|  | <i>yddA</i>                                                                    | 105860 | 107644 | <i>yddA</i>                                       |                       | 95.19 | 97.48 |
|  | <i>fbpB</i>                                                                    | 110130 | 112130 | <i>fbpB</i>                                       |                       | 94    | 96.4  |
|  | <i>afuA</i>                                                                    | 112262 | 113293 | <i>ABC transporter substrate-binding protein</i>  |                       | 95.16 | 97.97 |
|  | <i>ceuD</i>                                                                    | 145185 | 145943 | <i>ceuD</i>                                       |                       | 97.1  | 98.81 |
|  | <i>ceuC</i>                                                                    | 145946 | 146893 | <i>ceuC</i>                                       |                       | 97.57 | 98.1  |
|  | <i>cirA</i>                                                                    | 146541 | 148835 | <i>cirA</i>                                       |                       | 98.95 | 98.95 |
|  | <i>ceuB</i>                                                                    | 146886 | 147782 | <i>ceuB</i>                                       |                       | 99.44 | 99.67 |
|  | <i>cysG</i>                                                                    | 188818 | 190278 | <i>cysG</i>                                       |                       | 95.62 | 97.54 |
|  | <i>efeB</i>                                                                    | 192983 | 194173 | <i>efeB</i>                                       |                       | 99.24 | 98.74 |
|  | <i>fur</i>                                                                     | 216404 | 216853 | <i>fur</i>                                        |                       | 99.56 | 100   |
|  | <i>cirA</i>                                                                    | 261290 | 263803 | <i>cirA</i>                                       |                       | 96.86 | 98.69 |
|  | <i>cyaA</i>                                                                    | 284521 | 284826 | <i>cyaY</i>                                       |                       | 99.67 | 100   |
|  | <i>cirA</i>                                                                    | 298547 | 301384 | <i>cirA</i>                                       |                       | 99.26 | 99.68 |
|  | <i>cirA</i>                                                                    | 305007 | 307307 | <i>cirA</i>                                       |                       | 99.46 | 99.59 |
|  | <i>znuB</i>                                                                    | 395938 | 396768 | <i>znuB</i>                                       |                       | 98.19 | 99.28 |
|  | <i>exbB</i>                                                                    | 474019 | 474471 | <i>exbB</i>                                       |                       | 94.92 | 100   |
|  | <i>exbD</i>                                                                    | 474516 | 474905 | <i>exbD</i>                                       |                       | 99.23 | 100   |
|  | <i>Protein TonB</i>                                                            | 474915 | 475760 | <i>Energy transducer TonB</i>                     |                       | 97.4  | 98.94 |
|  | NA                                                                             | NA     | NA     | Wzz/FepE/Etk N-terminal domain-containing protein |                       | NA    | NA    |
|  | NA                                                                             | NA     | NA     | <i>rfaJ</i>                                       |                       | NA    | NA    |
|  | NA                                                                             | NA     | NA     | <i>Glycosyltransferase family 4 protein</i>       | Strain specific genes | NA    | NA    |
|  | <i>glycosyltransferase family 2 protein</i>                                    | 23864  | 25705  | NA                                                |                       | NA    | NA    |
|  | <i>rfaF</i>                                                                    | 220335 | 221534 | NA                                                |                       | NA    | NA    |
|  | <i>fabZ</i>                                                                    | 154332 | 154796 | <i>fabZ</i>                                       |                       | 93.98 | 99.35 |
|  | <i>Udp-glcna--lipooligosaccharide n-acetylglucosaminyl glycosyltransferase</i> | 463019 | 463717 | <i>Glycosyltransferase family 25 protein</i>      | Shared genes          | 94.42 | 100   |
|  | <i>glf</i>                                                                     | 61311  | 62462  | <i>glf</i>                                        |                       | 55.01 | 44.63 |

The nucleotide and amino acid sequences of *glf* gene of strain 4524 show 89.93% and 94% similarity, respectively, to that of

homologue gene in *A.*  
*pleuropneumoniae* strain 3906

|                                                                    |        |        |                                              |       |       |
|--------------------------------------------------------------------|--------|--------|----------------------------------------------|-------|-------|
| <i>glmU</i>                                                        | 65991  | 67355  | <i>glmU</i>                                  | 96.56 | 98.9  |
| <i>kdsB1</i>                                                       | 468431 | 469183 | <i>kdsB</i>                                  | 96.55 | 99.2  |
| <i>lptD</i>                                                        | 55830  | 58160  | <i>lptD</i>                                  | 90.87 | 96.39 |
| <i>lptE</i>                                                        | 107788 | 108282 | <i>lptE</i>                                  | 95.76 | 98.78 |
| <i>lptC</i>                                                        | 174746 | 175369 | <i>lptC</i>                                  | 99.68 | 99.51 |
| <i>lptA</i>                                                        | 175366 | 175866 | <i>lptA</i>                                  | 95.32 | 97    |
| <i>lptF</i>                                                        | 265316 | 266419 | <i>lptF</i>                                  | 93.3  | 99.18 |
| <i>lptG</i>                                                        | 266420 | 267502 | <i>lptG</i>                                  | 95.94 | 99.72 |
| <i>murG</i>                                                        | 54675  | 55730  | <i>murG</i>                                  | 98.2  | 99.14 |
| <i>kdsC</i>                                                        | 16446  | 16982  | <i>kdsC</i>                                  | 97.21 | 98.88 |
| <i>wbaP</i>                                                        | 58126  | 59544  | <i>wbaP</i>                                  | 65.04 | 63.58 |
| <i>Pilin</i>                                                       |        |        |                                              |       |       |
| <i>glycosyltransferase</i>                                         | 118954 | 119595 | <i>Glycosyltransferase family 4 protein</i>  | 89.04 | 81.94 |
| <i>erase</i>                                                       |        |        |                                              |       |       |
| <i>Glycosyltransferase</i>                                         | 146773 | 147561 | <i>Glycosyltransferase family 2 protein</i>  | 96.58 | 99.24 |
| <i>erase</i>                                                       |        |        |                                              |       |       |
| <i>Beta-galactoside</i>                                            |        |        |                                              |       |       |
| <i>alpha-2,3-sialyltransferase</i>                                 | 328450 | 329379 | <i>Glycosyltransferase family 52</i>         | 99.03 | 99.35 |
| <i>se</i>                                                          |        |        |                                              |       |       |
| <i>Lipooligosaccharide N-acetylglucosamine glycosyltransferase</i> |        |        |                                              |       |       |
| <i>wcaA</i>                                                        | 329383 | 330153 | <i>Glycosyltransferase family 25 protein</i> | 94.03 | 94.94 |
| <i>wcaA</i>                                                        | 331344 | 332225 | <i>wcaA</i>                                  | 98.53 | 97.95 |
| <i>wcaA</i>                                                        | 165271 | 166029 | <i>wcaA</i>                                  | 97.63 | 99.2  |
| <i>rfaF</i>                                                        | 166998 | 168035 | <i>rfaF</i>                                  | 96.24 | 99.71 |

The nucleotide and amino acid sequences of *wbaP* gene of strain 4524 show 96.83% and 94% similarity, respectively, to that of homologue gene of *A. suis* strains NCTC12996 and ATCC 33415

|                                                                                     |        |        |                                                                                  |       |        |
|-------------------------------------------------------------------------------------|--------|--------|----------------------------------------------------------------------------------|-------|--------|
| <i>Glycosyl transferase family protein</i>                                          | 179116 | 179904 | <i>Glycosyltransferase family 8 protein</i>                                      | 85.62 | 88.21  |
| <i>wcaA</i>                                                                         | 35490  | 36281  | <i>Glycosyltransferase family 8 protein</i>                                      | 86.82 | 89.26  |
| <i>rfaF</i>                                                                         | 220335 | 221534 | <i>rfaF</i>                                                                      | 95.25 | 97.75  |
| <i>rfaF</i>                                                                         | 306770 | 307816 | <i>rfaF</i>                                                                      | 99.62 | 99.71  |
| <i>Glyco-trans-2-like domain-containing protein</i>                                 | 385209 | 386027 | <i>Glycosyltransferase family 2 protein</i>                                      | 89.01 | 91.94  |
| <i>Udp-glcnaac--lipooligosacch aride n-acetylglucosa minyl glycosyltransfe rase</i> | 463019 | 463717 | <i>Udp-glcnaac--lipooligosaccharide n-acetylglucosaminyl glycosyltransferase</i> | 94.42 | 95.27  |
| <i>rfaJ</i>                                                                         | 299322 | 300164 | <i>rfaJ</i>                                                                      | 89.21 | 90.03  |
| <i>wcaA</i>                                                                         | 35490  | 36281  | <i>wcaA</i>                                                                      | 89.55 | 92.04  |
| <i>rfaJ</i>                                                                         | 345    | 1190   | <i>rfaJ</i>                                                                      | 99.88 | 100    |
| <i>glycosyltransfe rase family 2 protein</i>                                        | 23864  | 25705  | <i>Glycosyltransferase family 2 protein</i>                                      | 37.49 | 20.22  |
| <i>msrQ</i>                                                                         | 5298   | 5894   | <i>msrQ</i>                                                                      | 99.33 | 98.995 |
| <i>gmhA</i>                                                                         | 35386  | 35970  | <i>gmhA/ipcA</i>                                                                 | 98.8  | 99.48  |
| <i>kdtA</i>                                                                         | 298707 | 299987 | <i>waaA</i>                                                                      | 91.65 | 95.08  |
| <i>yciS</i>                                                                         | 128557 | 128847 | <i>yciS</i>                                                                      | 93.47 | 98.96  |
| <i>lapB</i>                                                                         | 128847 | 130034 | <i>lapB</i>                                                                      | 97.81 | 98.99  |
| <i>waaF</i>                                                                         | 78287  | 79324  | <i>waaF</i>                                                                      | 94.99 | 96.53  |
| <i>waaC</i>                                                                         | 79385  | 80359  | <i>rfaC</i>                                                                      | 95.94 | 96.25  |
| <i>rfbX</i>                                                                         | 327242 | 328450 | <i>rfbX</i>                                                                      | 97.93 | 99.25  |
| <i>rfbB</i>                                                                         | 56970  | 58043  | <i>rfbB</i>                                                                      | 92.53 | 95.25  |
| <i>glf</i>                                                                          | 61311  | 62462  | <i>glf</i>                                                                       | 55    | 43.43  |

The amino acid sequence of glycosyltransferase family 2 protein was 99.35% identical to that of holomgue protein in *A. ureae*

The nucleotide and amino acid sequences of *glf* gene of strain 4524 showed 89.93% and 94% similarity, respectively, to that of homologue gene in *A. pleuropneumoniae* strain 3906

|     |    |    |    |                             |    |    |
|-----|----|----|----|-----------------------------|----|----|
| CPS | NA | NA | NA | <i>Glycosyl transferase</i> | NA | NA |
|-----|----|----|----|-----------------------------|----|----|

|               |                                          |        |        |                                                                     |                       |       |       |
|---------------|------------------------------------------|--------|--------|---------------------------------------------------------------------|-----------------------|-------|-------|
|               | <i>Putative glycosyltransferase YkoT</i> | 65531  | 66496  | NA                                                                  | Strain specific genes | NA    | NA    |
|               | <i>murB</i>                              | 67774  | 68802  | <i>murB</i>                                                         |                       | 99.03 | 98.83 |
|               | <i>murC</i>                              | 53196  | 54623  | <i>murC</i>                                                         |                       | 94.19 | 98.74 |
|               | <i>murD</i>                              | 57061  | 58371  | <i>murD</i>                                                         |                       | 94.51 | 98.17 |
|               | <i>murE</i>                              | 61169  | 62674  | <i>murE</i>                                                         |                       | 97.34 | 97.61 |
|               | <i>murF</i>                              | 59650  | 61044  | <i>murF</i>                                                         |                       | 96.77 | 98.71 |
|               | <i>wecC</i>                              | 9986   | 11254  | <i>wecC</i>                                                         |                       | 96.69 | 98.1  |
|               | <i>rimI</i>                              | 9363   | 9986   | <i>rffC</i>                                                         |                       | 95.99 | 96.63 |
|               | <i>cysA</i>                              | 70739  | 71554  | <i>elaA</i>                                                         |                       | 94.42 | 95.83 |
|               | <i>wecE</i>                              | 8214   | 9347   | <i>rffA</i>                                                         | Shared genes          | 98.41 | 98.94 |
|               | <i>rfbA</i>                              | 56101  | 56973  | <i>rfbA</i>                                                         |                       | 97.25 | 97.6  |
|               | <i>gutQ</i>                              | 117062 | 117997 | <i>gutQ</i>                                                         |                       | 88.68 | 94.23 |
|               | <i>Glycosyl transferase</i>              | 120713 | 121546 | <i>Glycosyl transferase</i>                                         |                       | 87.65 | 88.49 |
|               | <i>galE</i>                              | 124052 | 125068 | <i>galE</i>                                                         |                       | 90.86 | 98.52 |
|               | <i>murA</i>                              | 141521 | 142798 | <i>murA</i>                                                         |                       | 96.48 | 98.6  |
|               | <i>rpiR</i>                              | 155869 | 156741 | <i>rpiR</i>                                                         |                       | 97.59 | 100   |
|               | <i>nagC</i>                              | 19616  | 20488  | <i>nagC</i>                                                         |                       | 97.02 | 98.28 |
|               | <i>rfaF</i>                              | 219155 | 220342 | <i>rfaF</i>                                                         |                       | 94.11 | 96.71 |
|               | <i>wza</i>                               | 116057 | 117214 | <i>wza</i>                                                          |                       | 93.26 | 98.44 |
|               | NA                                       | NA     | NA     | <i>ShlB/FhaC/HecB family hemolysin secretion/activation protein</i> | Strain specific genes | NA    | NA    |
|               | NA                                       | NA     | NA     | <i>ShlB/FhaC/HecB family hemolysin secretion/activation protein</i> |                       | NA    | NA    |
|               | <i>pgaC</i>                              | 172303 | 173538 | NA                                                                  |                       | NA    | NA    |
|               | <i>dps</i>                               | 96363  | 96932  | <i>dps</i>                                                          |                       | 97.72 | 99.47 |
| Miscellaneous | <i>UreD</i>                              | 54034  | 54846  | <i>UreD</i>                                                         |                       | 97.66 | 100   |
|               | <i>UreG</i>                              | 55032  | 55667  | <i>UreG</i>                                                         |                       | 94.81 | 99.53 |
|               | <i>UreF</i>                              | 55688  | 56398  | <i>UreF</i>                                                         |                       | 98.39 | 100   |
|               | <i>UreE</i>                              | 56383  | 56946  | <i>UreE</i>                                                         | Shared genes          | 99.47 | 100   |
|               | <i>UreA</i>                              | 59925  | 60227  | <i>UreA</i>                                                         |                       | 99.67 | 100   |
|               | <i>UreB</i>                              | 59493  | 59798  | <i>UreB</i>                                                         |                       | 100   | 100   |
|               | <i>UreC</i>                              | 57763  | 59481  | <i>UreC</i>                                                         |                       | 98.37 | 99.48 |
|               | <i>Recombination protein 2</i>           | 94843  | 97137  | <i>DNA internalization-related competence protein ComEC/Rec2</i>    |                       | 95.45 | 94.64 |

|                  |                                    |        |        |                                                            |              |       |       |                                                                                                                                                                                                                     |
|------------------|------------------------------------|--------|--------|------------------------------------------------------------|--------------|-------|-------|---------------------------------------------------------------------------------------------------------------------------------------------------------------------------------------------------------------------|
|                  | <i>fhaC</i>                        | 441089 | 442843 | <i>fhaC</i>                                                |              | 91.69 | 95.72 |                                                                                                                                                                                                                     |
|                  | <i>gstA</i>                        | 219432 | 220058 | <i>gstA</i>                                                |              | 92.66 | 99.04 |                                                                                                                                                                                                                     |
|                  | <i>hypothetical protein</i>        | 57019  | 57306  | <i>gstA</i>                                                |              | 97.92 | 98.96 |                                                                                                                                                                                                                     |
|                  | <i>gstA</i>                        | 19439  | 20056  | <i>gstA</i>                                                |              | 98.38 | 99.51 |                                                                                                                                                                                                                     |
|                  | <i>pgaB</i>                        | 173552 | 175324 | <i>pgaB</i>                                                |              | 98.93 | 99.32 |                                                                                                                                                                                                                     |
|                  | <i>pgaA</i>                        | 175338 | 177758 | <i>pgaA</i>                                                |              | 94.63 | 96.9  |                                                                                                                                                                                                                     |
| OMP              | <i>ompC</i>                        | 93317  | 94447  | <i>ompC</i>                                                |              | 95.5  | 96.81 |                                                                                                                                                                                                                     |
|                  | Outer membrane protein P2 (OMP P2) | 169146 | 170249 | Outer membrane protein P2 (OMP P2)                         | Shared genes | 99.18 | 99.45 |                                                                                                                                                                                                                     |
|                  | 47 kDa outer membrane protein      | 72215  | 73555  | Outer membrane protein transport protein (OMPP1/FadL/TodX) |              | 94.77 | 93.88 |                                                                                                                                                                                                                     |
|                  | <i>ompW</i>                        | 250909 | 251562 | <i>ompW</i>                                                |              | 99.24 | 100   |                                                                                                                                                                                                                     |
| Salicylic acid   | <i>nanE</i>                        | 20498  | 21187  | <i>nanE</i>                                                | Shared genes | 97.54 | 97.82 |                                                                                                                                                                                                                     |
|                  | <i>nanA</i>                        | 18717  | 19595  | <i>nanA</i>                                                |              | 98.18 | 99.31 |                                                                                                                                                                                                                     |
| RTX toxin        | <i>apxIB</i>                       | 31379  | 33502  | <i>sunT</i>                                                | Shared genes | 64.78 | 64.55 | The nucleotide and amino acid sequences of <i>apxIB</i> gene of strain 4524 showed 99.72% and 99.86% similarity, respectively, to <i>apxB</i> gene of <i>A. equuli</i> subsp. <i>haemolyticus</i> strain CCUG 19799 |
| Auto-transporter | <i>Autotransporter adhesin</i>     | 74395  | 78480  | YadA-like family protein                                   | Shared genes | 87.9  | 55.8  | The nucleotide and amino acid sequences of <i>Autotransporter adhesin</i> gene of strain 4524 showed 95.25% and 96% similarity, respectively, to that of homologue gene in <i>A. suis</i> strain ATCC 33415         |
